# Supplementary material
Source: MDPI journal article supplement (https://www.mdpi.com/2072-4292/13/8/1495)
Supplement: s1 [file s1]

# Supplementary Materials: A Robust Prediction Model for Species Distribution Using Bagging Ensemble with Deep Neural Networks

Jehyeok Rew, Yongjang Cho and Eenjun Hwang\*

1. Our source code of pseudo-absence generation using ‘mopa’ R software package located in “pre-processing”. Our source code can be found in <https://github.com/dydwkd486/SDMsBaggingEnsemble/tree/main/preprocessing>.
2. Our source code of bootstrapping using ‘boot’ R software package located in “pre-processing”. Our source code can be found in [https://github.com/dydwkd486/SDMsBaggingEnsemble/blob/main/preprocessing/boot\\_SDM.r](https://github.com/dydwkd486/SDMsBaggingEnsemble/blob/main/preprocessing/boot_SDM.r).
3. Experimental codes of our proposed model and comparison models including GLM, GBM, CTA, SNN, FDA, MARS, RF, SRE, and MAXENT are located in “ensemble-DNN”. Source code of our proposed model was located in <https://github.com/dydwkd486/SDMsBaggingEnsemble/tree/main/ensemble-DNN/python/sdmdl>. Comparison codes in <https://github.com/dydwkd486/SDMsBaggingEnsemble/tree/main/ensemble-DNN/R> were used in our experiments.

**Table S1.** Selected environmental parameters using stepwise VIF algorithm runs (VIF < 10).

Habitats characteristic of our target species (*Hynobius leechii*, *Cyanopica cyanus*, *Platalea minor*, *Hypsipetes amaurotis* and *Hypsipetes amaurotis*) are closely related to the aquatic condition. Therefore, we used a GlobCover\_14 (Water bodies) as a retained parameter until stepwise process is done.

| Parameter name | Description                                                             | Scale      | VIF value |
|----------------|-------------------------------------------------------------------------|------------|-----------|
| Climate_03     | Isothermality                                                           | 30 seconds | 1.556019  |
| Climate_04     | Temperature seasonality                                                 | 30 seconds | 5.994098  |
| Climate_05     | Mean temperature of wettest quarter                                     | 30 seconds | 1.78158   |
| Climate_12     | Annual precipitation                                                    | 30 seconds | 6.850899  |
| Climate_13     | Precipitation of wettest month                                          | 30 seconds | 6.646591  |
| Climate_14     | Precipitation of driest month                                           | 30 seconds | 2.180855  |
| GlobCover_02   | Mosaic cropland (50%–70%)/vegetation (20%–50%)                          | 300 meters | 1.052725  |
| GlobCover_03   | Mosaic vegetation (50%–70%)/cropland (20%–50%)                          | 300 meters | 1.05982   |
| GlobCover_04   | Closed (>40%) broadleaved deciduous forest (>5 m)                       | 300 meters | 6.85911   |
| GlobCover_05   | Closed (>40%) needle leaved evergreen forest (>5 m)                     | 300 meters | 1.201699  |
| GlobCover_06   | Open (15%–40%) needle leaved deciduous or evergreen forest (>5 m)       | 300 meters | 3.888618  |
| GlobCover_07   | Closed to open (>15%) mixed broadleaved and needle leaved forest (>5 m) | 300 meters | 1.458814  |
| GlobCover_08   | Mosaic forest or shrubland (50%–70%)/grassland (20%–50%)                | 300 meters | 6.09256   |
| GlobCover_09   | Mosaic grassland (50%–70%)/forest or shrubland (20%–50%)                | 300 meters | 2.447753  |
| GlobCover_10   | Closed to open (>15%) herbaceous vegetation                             | 300 meters | 1.119228  |
| GlobCover_11   | Sparse (<15%) vegetation                                                | 300 meters | 4.744607  |
| GlobCover_12   | Artificial surfaces and associated areas (urban areas > 50%)            | 300 meters | 1.097018  |
| GlobCover_13   | Bare areas                                                              | 300 meters | 1.232985  |
| GlobCover_14   | Water bodies                                                            | 300 meters | 1.545172  |

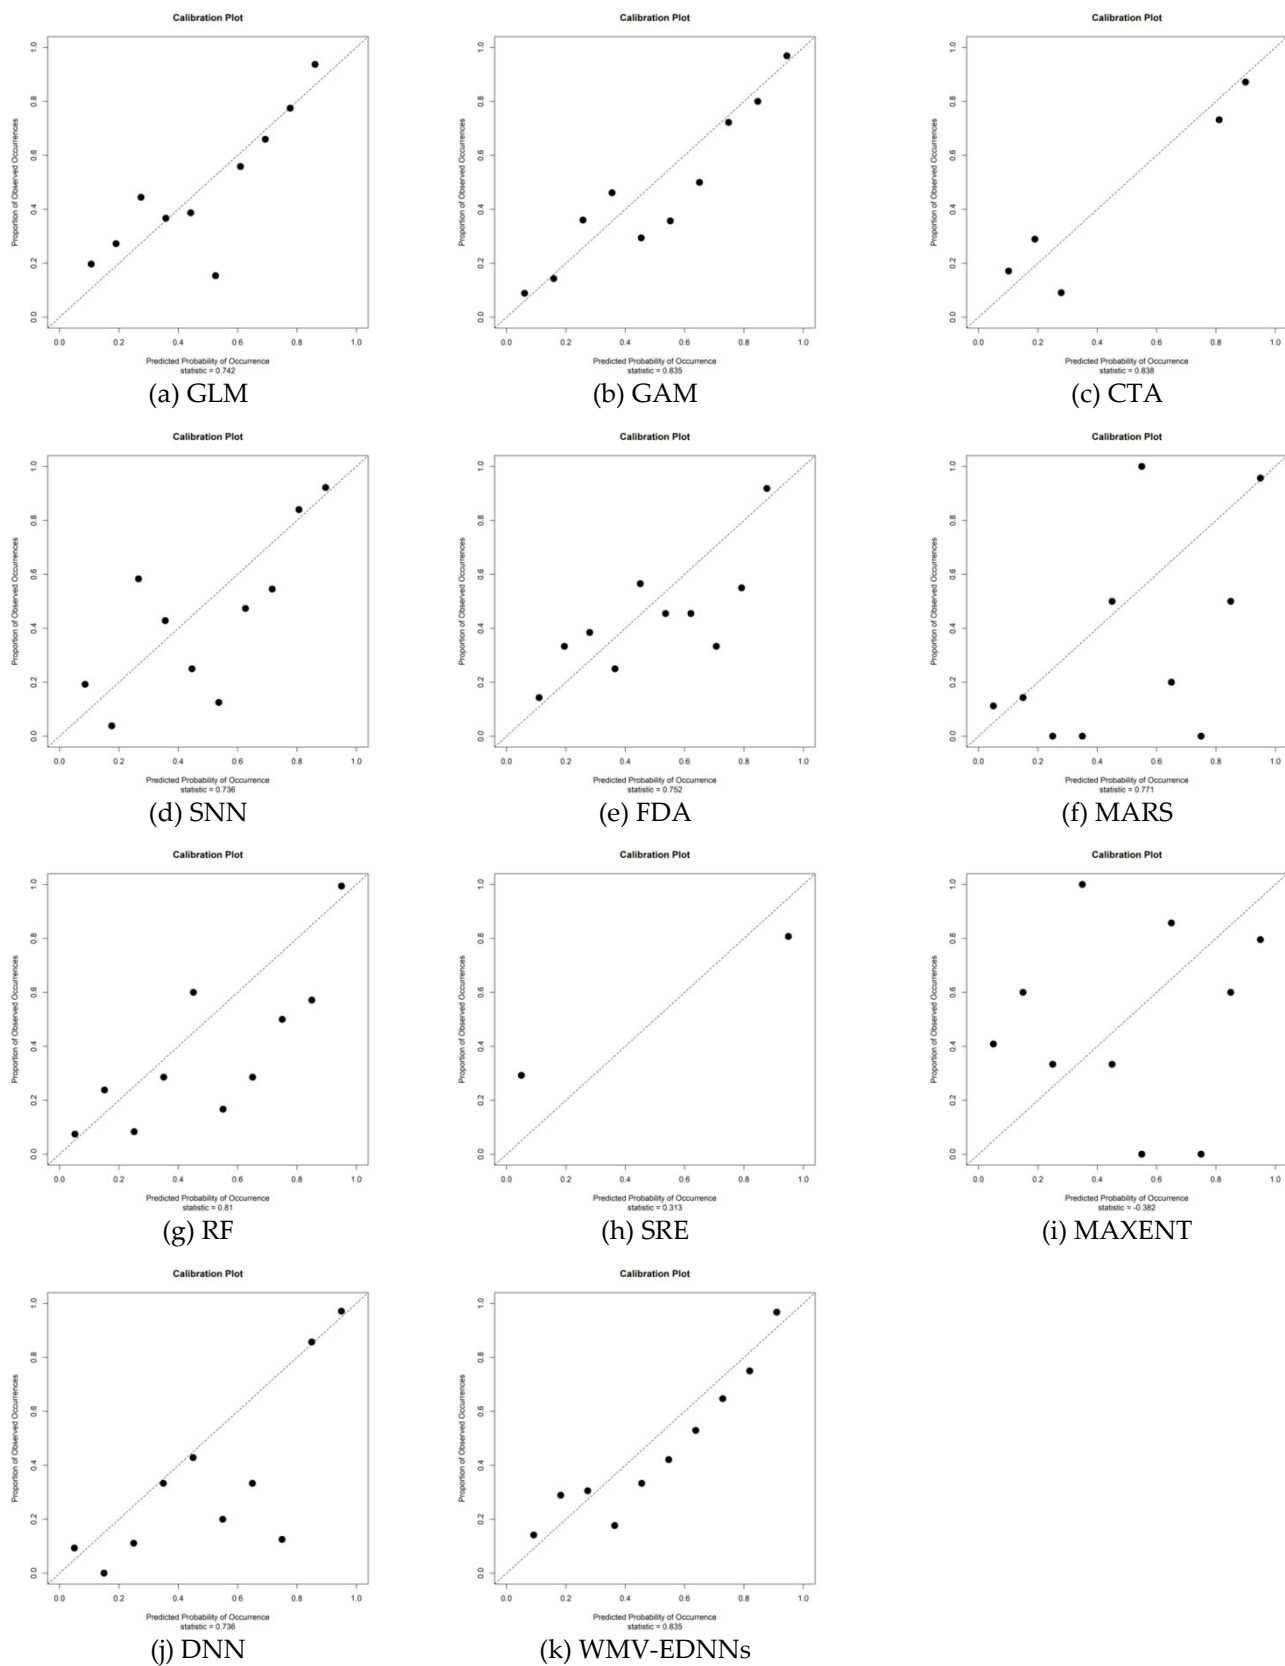

**Figure S1.** Calibration results for *Hynobius leechii* distribution.

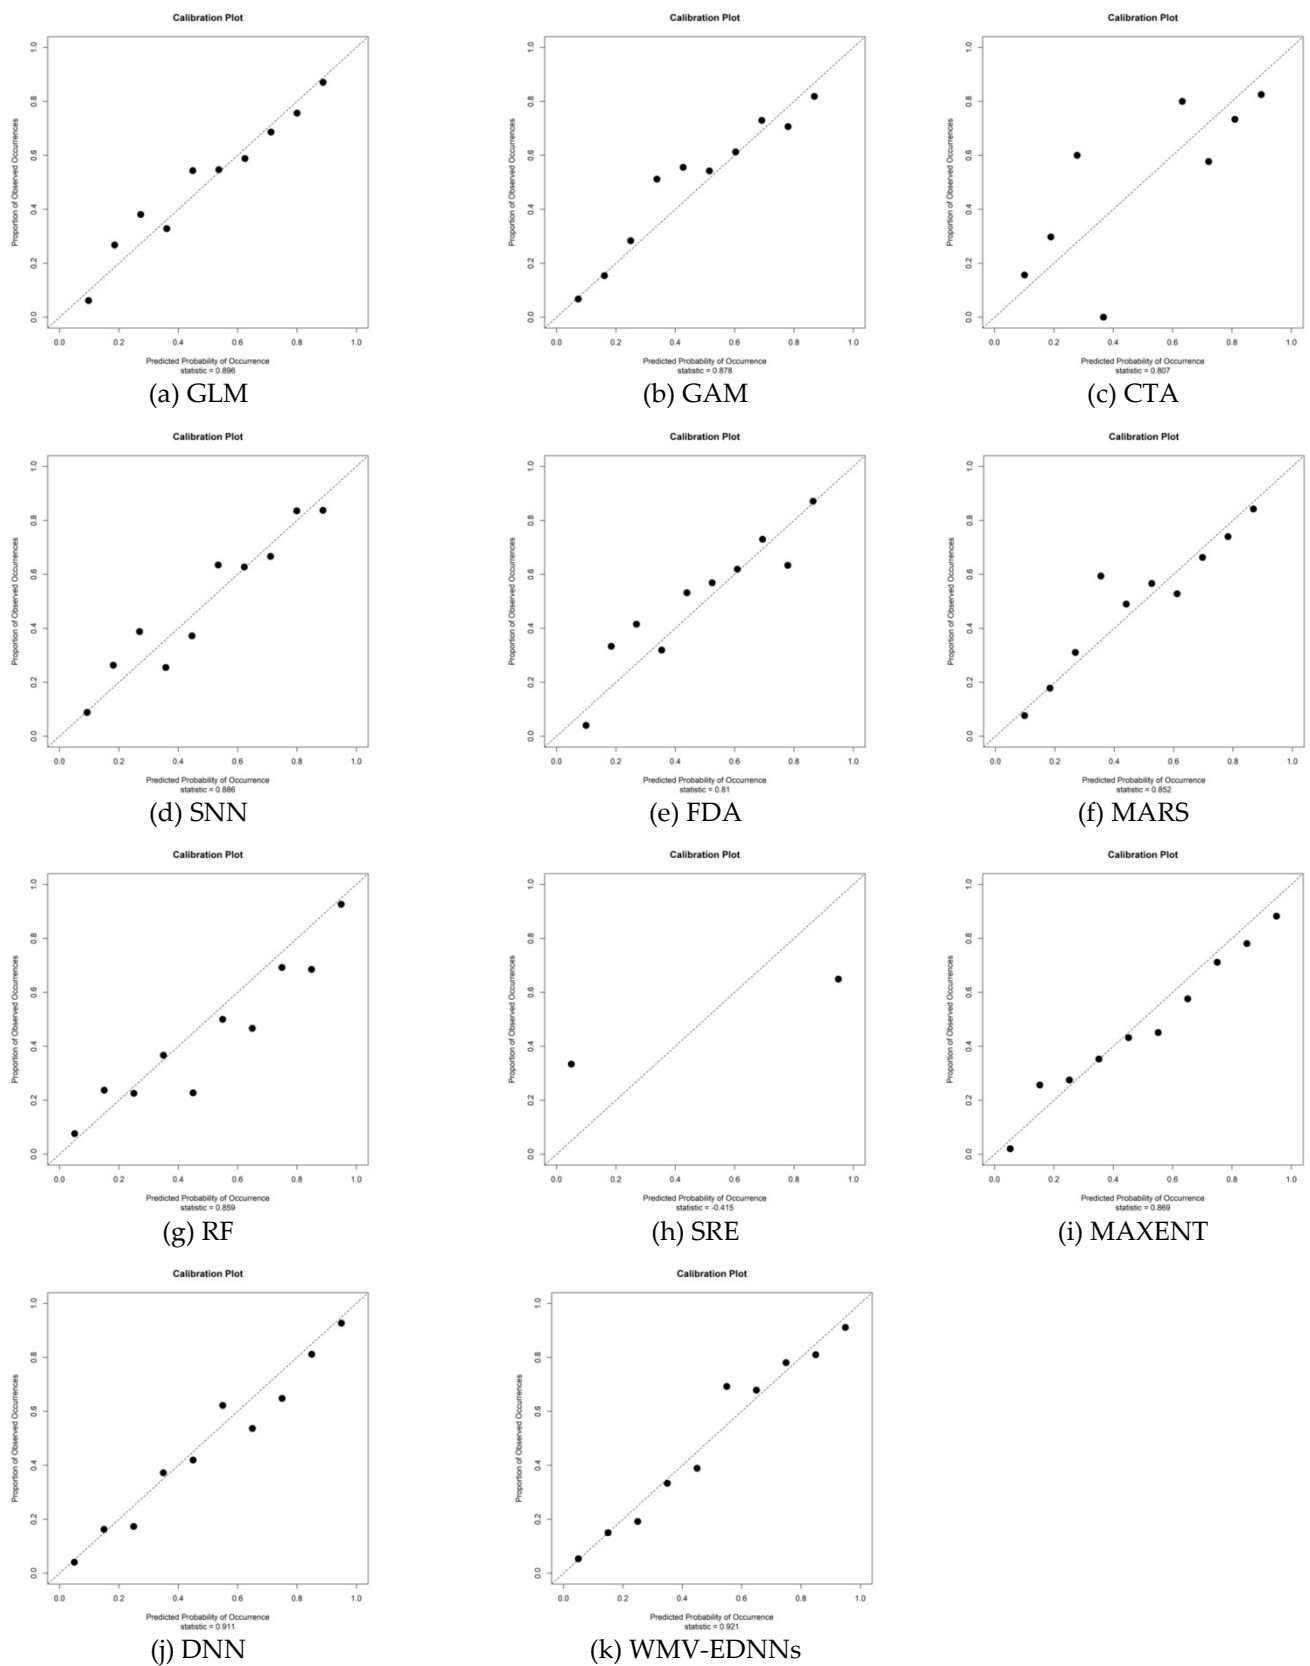

**Figure S2.** Calibration results for *Cyanopica cyanus* distribution.

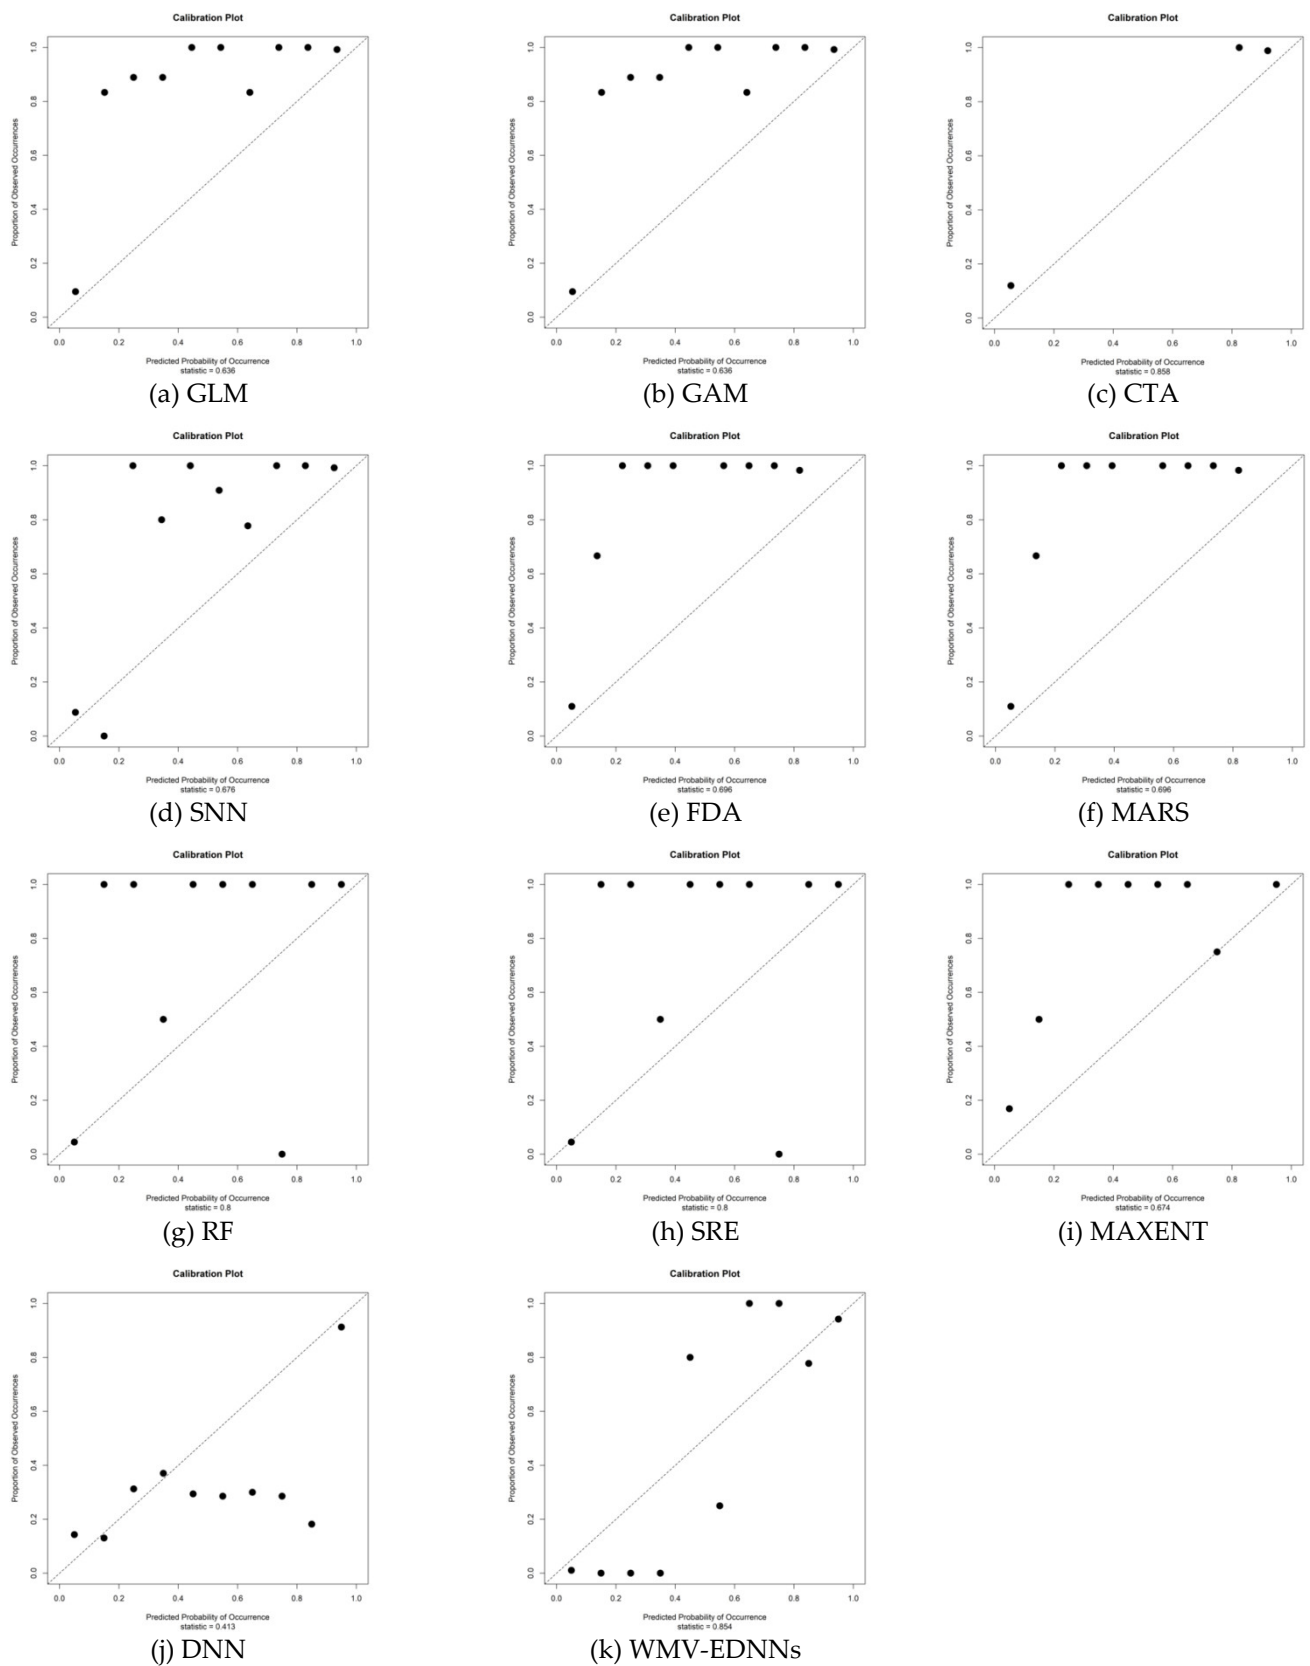

**Figure S3.** Calibration results for *Platalea minor* distribution.

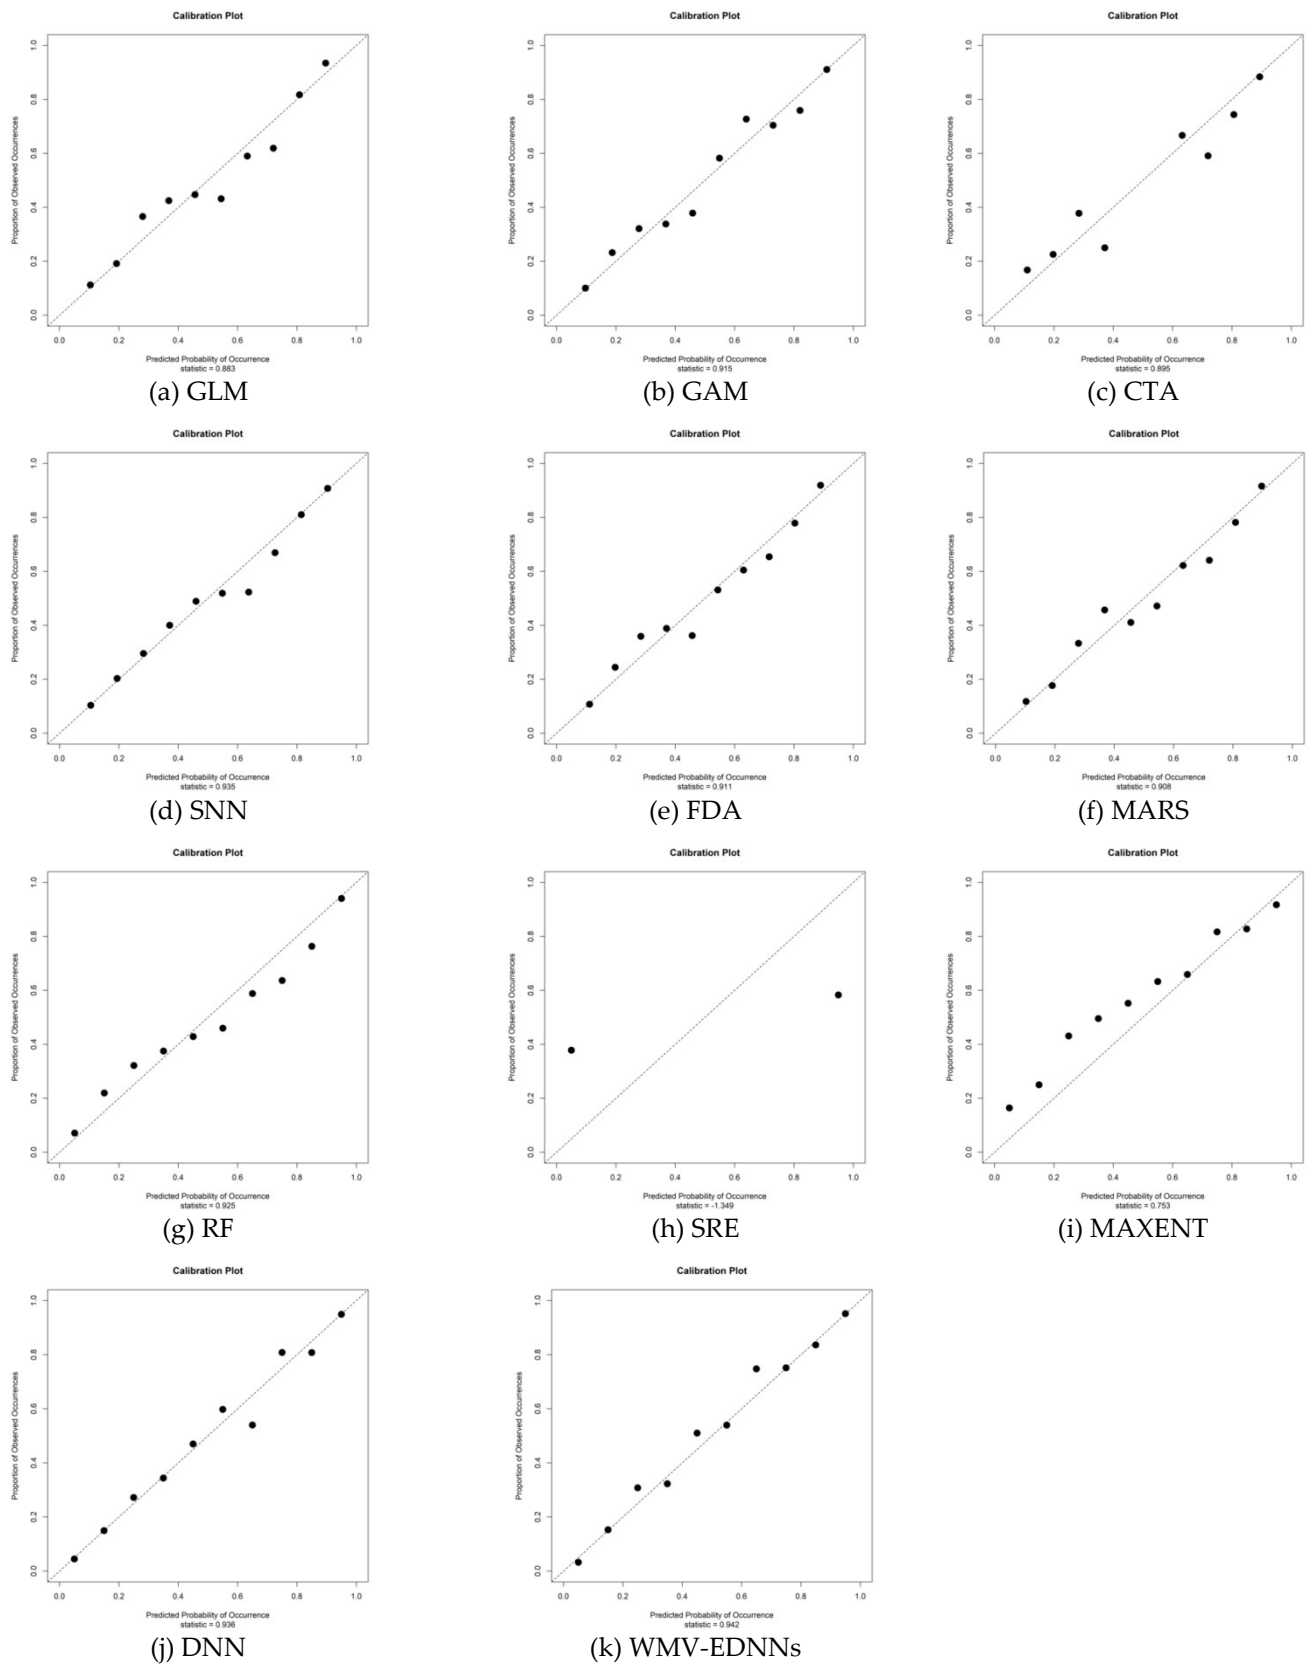

**Figure S4.** Calibration results for *Hypsipetes amaurotis* distribution.

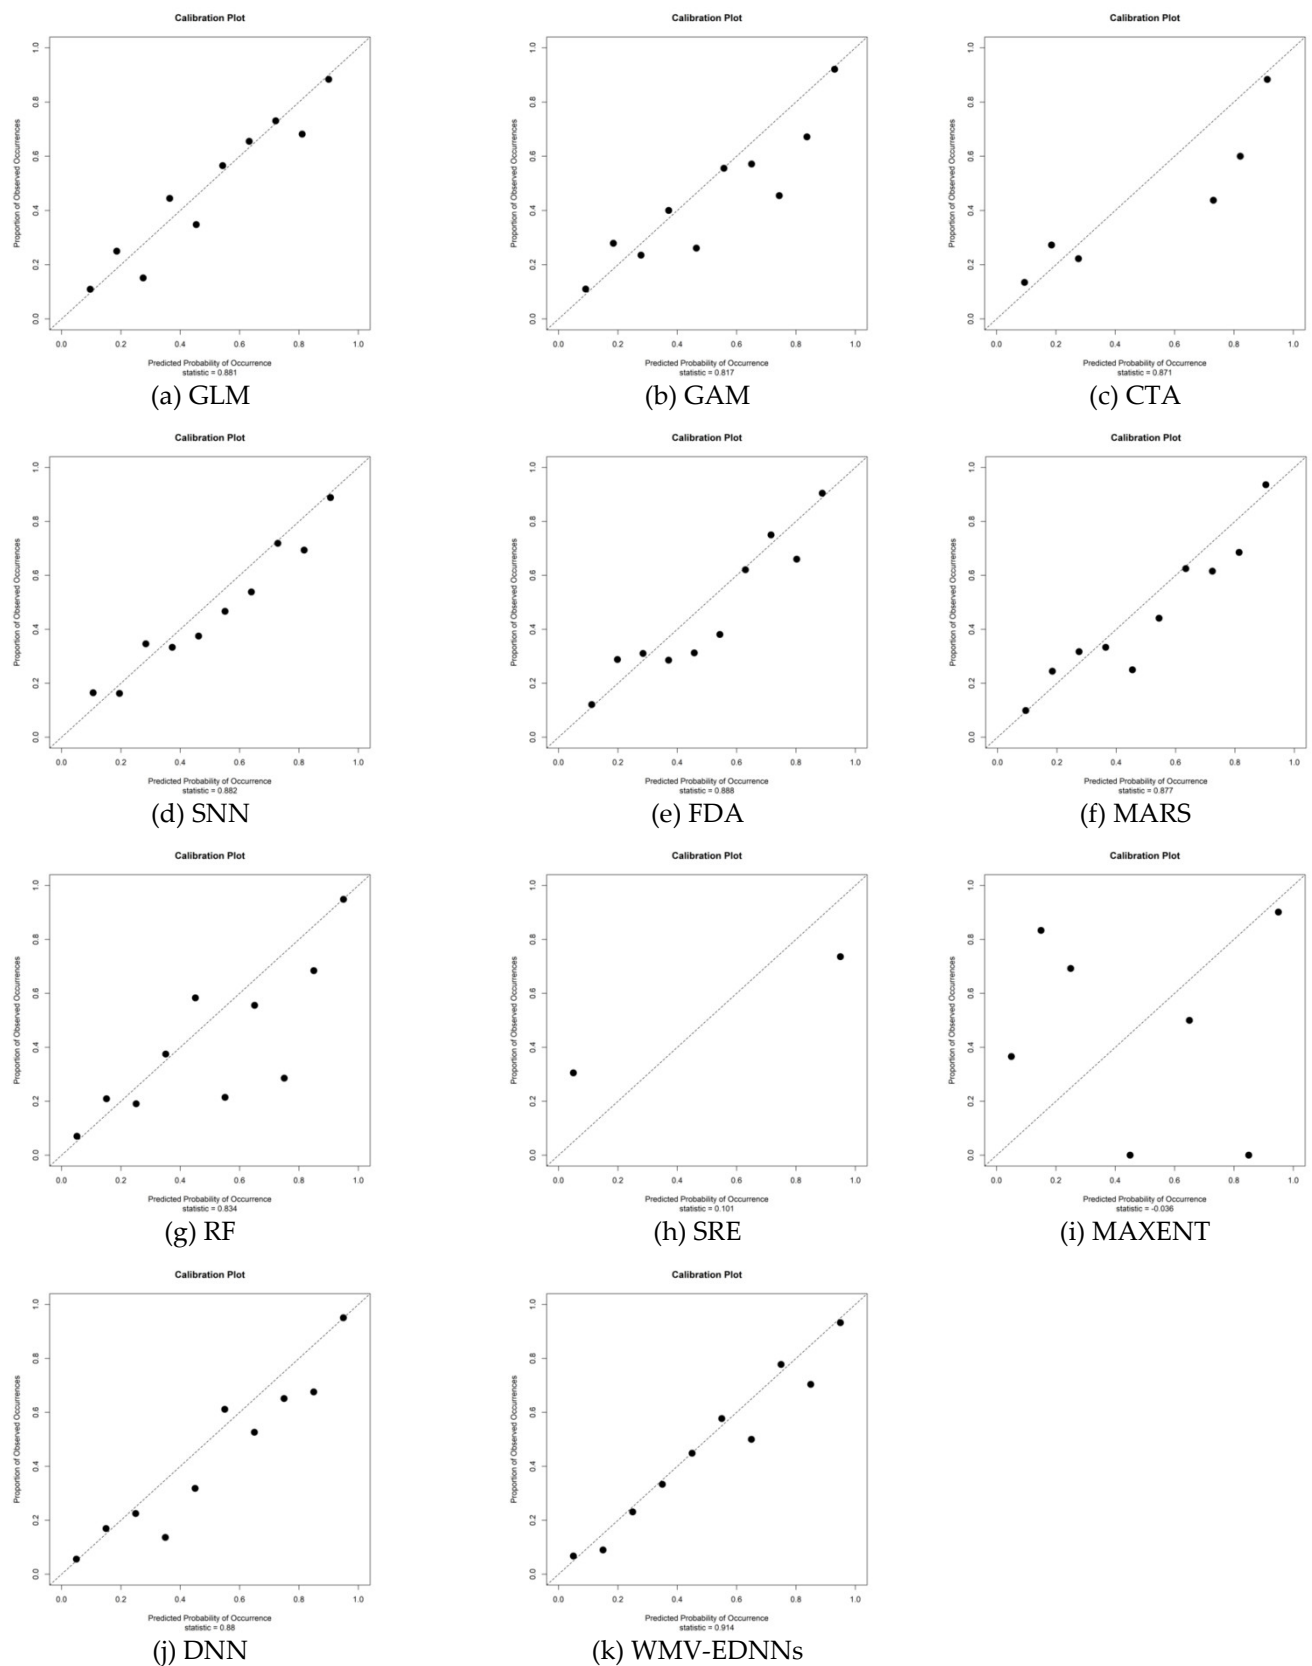

**Figure S5.** Calibration results for *Hyla japonica* distribution.
